# Supplementary material for: Integration of CD34+CD117dim population signature improves the prognosis prediction of acute myeloid leukemia
Source: PubMed Central journal article supplement (PMC9373712; doi:10.1186/s12967-022-03556-8), 2022-08-12

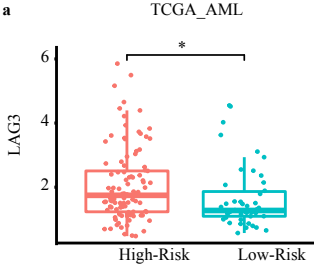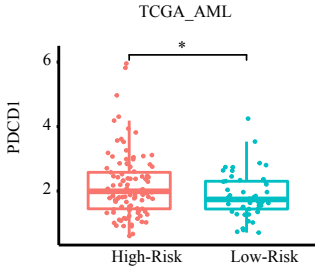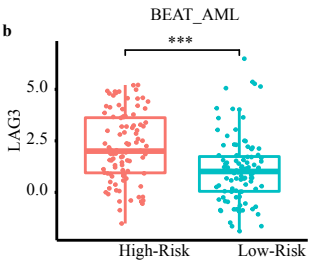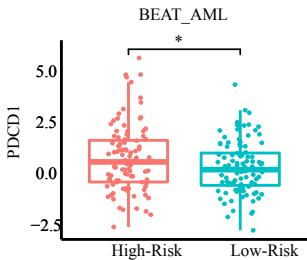

Supplement: 12967_2022_3556_MOESM7_ESM.pdf [file 12967_2022_3556_MOESM7_ESM.pdf]
