# Supplementary material for: Integration of CD34+CD117dim population signature improves the prognosis prediction of acute myeloid leukemia
Source: Springer Nature journal article supplement (doi:10.1186/s12967-022-03556-8), 2022-08-12

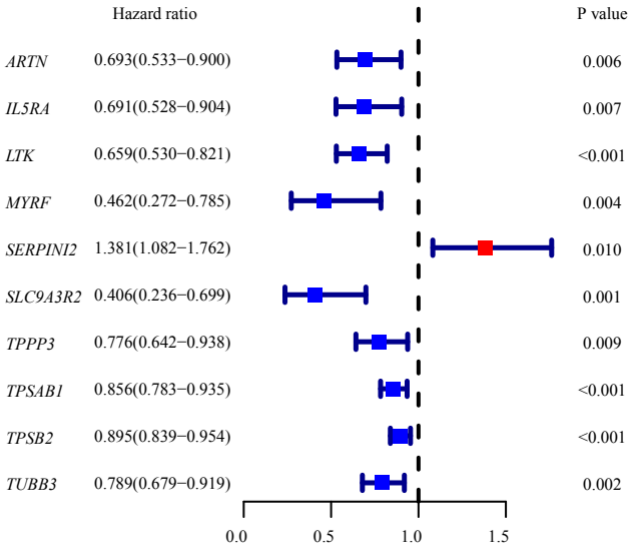

Supplement: MOESM2 [file 23361656]
