# Supplementary material for: Integration of CD34+CD117dim population signature improves the prognosis prediction of acute myeloid leukemia
Source: Springer Nature journal article supplement (doi:10.1186/s12967-022-03556-8), 2022-08-12

**ARTN**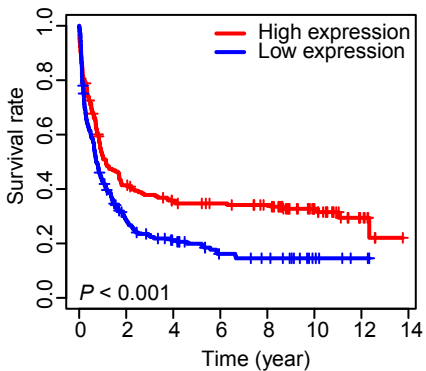**IL5RA**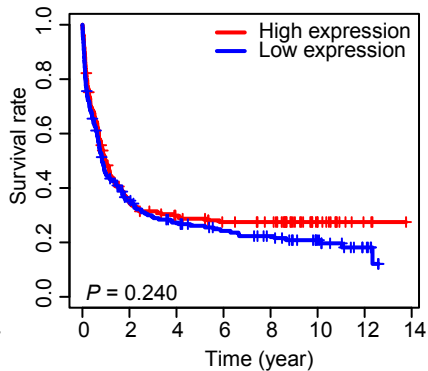**LTK**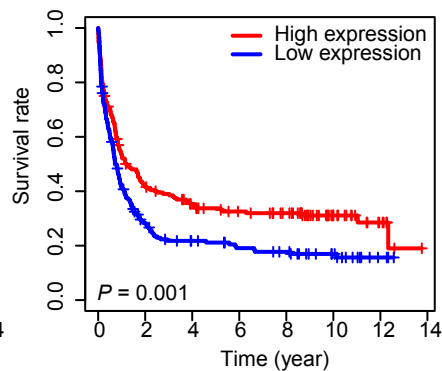**SERPINI2**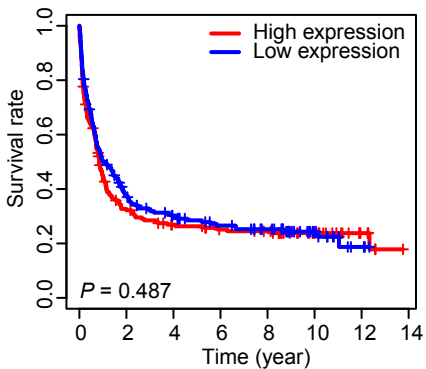**SLC9A3R2**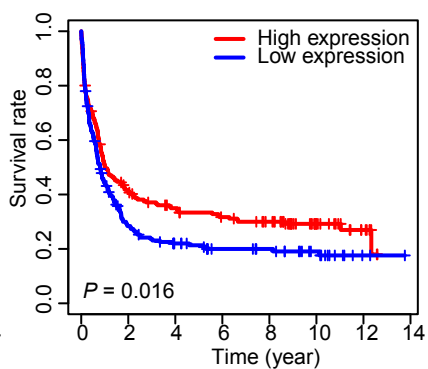**TPPP3**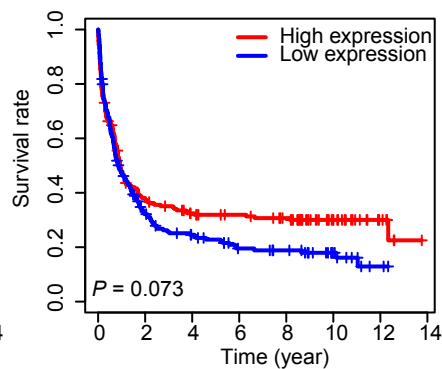

Supplement: MOESM3 [file 23361656]
