# Supplementary material for: Integration of CD34+CD117dim population signature improves the prognosis prediction of acute myeloid leukemia
Source: Springer Nature journal article supplement (doi:10.1186/s12967-022-03556-8), 2022-08-12
Supplement: MOESM5 [file 23361656]

**a**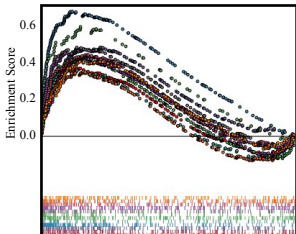

- HALLMARK\_COMPLEMENT
- HALLMARK\_E2F\_TARGETS
- HALLMARK\_G2M\_CHECKPOINT
- HALLMARK\_HEME\_METABOLISM
- HALLMARK\_IL6\_JAK\_STAT3\_SIGNALING
- HALLMARK\_INFLAMMATORY\_RESPONSE
- HALLMARK\_INTERFERON\_ALPHA\_RESPONSE
- HALLMARK\_INTERFERON\_GAMMA\_RESPONSE
- HALLMARK\_KRAS\_SIGNALING\_UP
- HALLMARK\_MITOTIC\_SPINDLE
- HALLMARK\_TNFA\_SIGNALING\_VIA\_NFKB
- HALLMARK\_UV\_RESPONSE\_DN

High Risk ←♦♦♦♦♦ Low Risk

**b**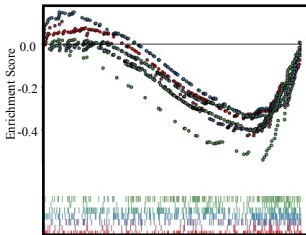

- HALLMARK\_ADIPOGENESIS
- HALLMARK\_CHOLESTEROL\_HOMEOSTASIS
- HALLMARK\_DNA\_REPAIR
- HALLMARK\_GLYCOLYSIS
- HALLMARK\_MYC\_TARGETS\_V1
- HALLMARK\_MYC\_TARGETS\_V2
- HALLMARK\_OXIDATIVE\_PHOSPHORYLATION

High Risk ←♦♦♦♦♦ Low Risk
